# Supplementary material for: The nuclear RNase III Drosha initiates microRNA processing
Source: Springer Nature journal article supplement (doi:10.1038/nature01957), 2003-09-01
Supplement: 41586_2003_BFnature01957_MOESM4_ESM.pdf [file 41586_2003_BFnature01957_MOESM4_ESM.pdf]

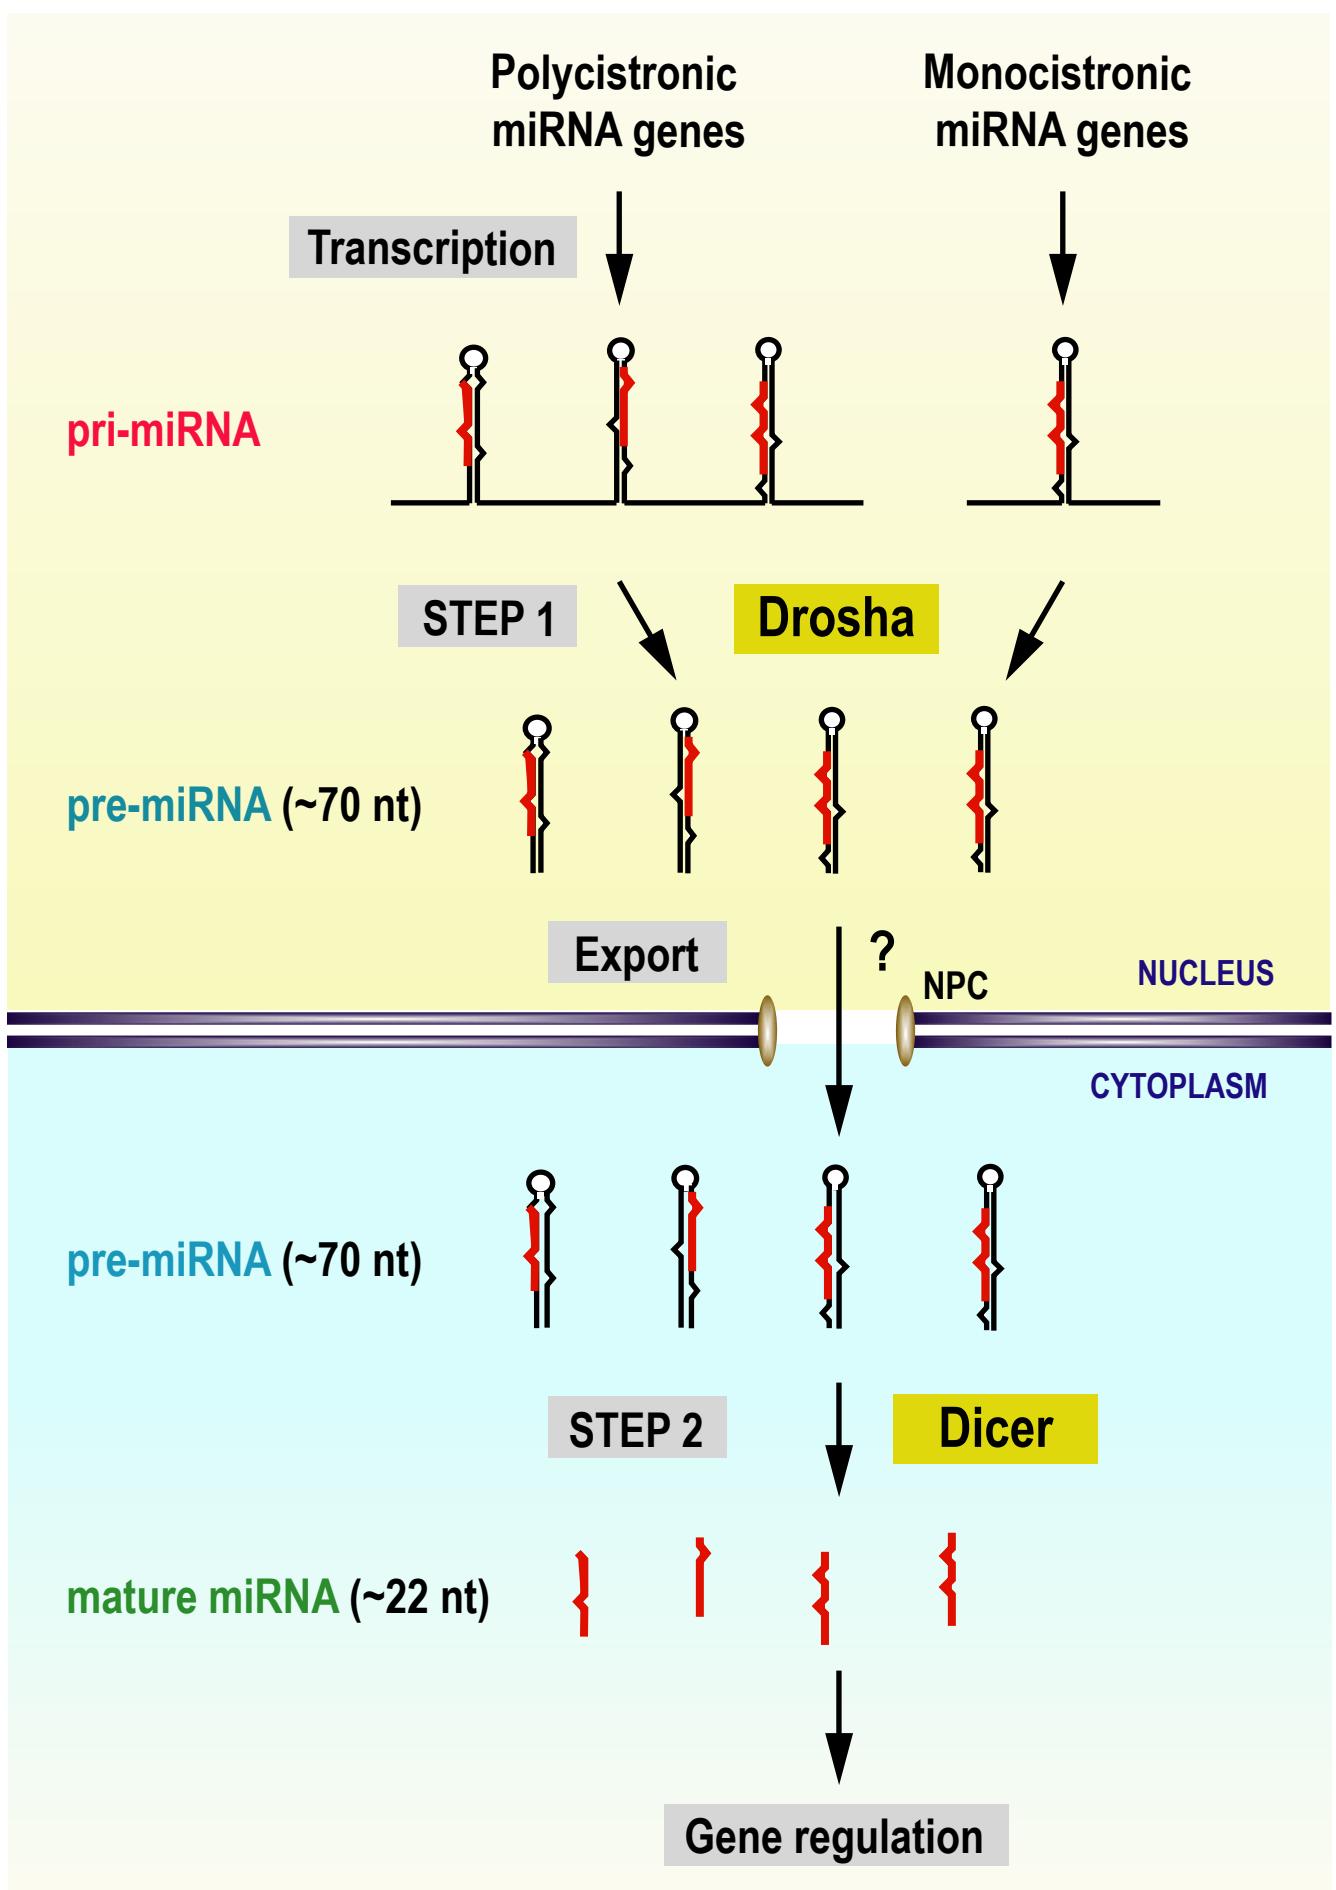

Supplementary Figure 4. Model for miRNA biogenesis.  
 2003-02-00491-S4.pdf
